# Supplementary material
Source: ML conference proceedings conference paper supplement (https://openaccess.thecvf.com/content/CVPR_2020/html/Wei_Combating_Noisy_Labels_CVPR_2020_paper.html)
Supplement: Supplementary file 1 [file Wei_Combating_Noisy_Labels_CVPR_2020_supplemental.pdf]

# Supplementary Materials

## 1. Dataset

the detailed characteristics of these datasets are shown in Table 1.

Table 1. Summary of datasets used in the experiments.

|                   | # of training | # of test | # of class | size             |
|-------------------|---------------|-----------|------------|------------------|
| <i>MNIST</i>      | 60,000        | 10,000    | 10         | $28 \times 28$   |
| <i>CIFAR-10</i>   | 50,000        | 10,000    | 10         | $32 \times 32$   |
| <i>CIFAR-100</i>  | 50,000        | 10,000    | 100        | $32 \times 32$   |
| <i>Clothing1M</i> | 1,000,000     | 10,000    | 14         | $224 \times 224$ |

## 2. Network Architecture

The network architectures of the MLP and CNN models are shown in Table 2.

Table 2. The models used on *MNIST*, *CIFAR-10* and *CIFAR-100*

| MLP on <i>MNIST</i>                         | CNN on <i>CIFAR-10</i> & <i>CIFAR-100</i>                                           |
|---------------------------------------------|-------------------------------------------------------------------------------------|
| $28 \times 28$ Gray Image                   | $32 \times 32$ RGB Image                                                            |
| Dense $28 \times 28 \rightarrow 256$ , ReLU | $3 \times 3$ , 64 BN, ReLU<br>$3 \times 3$ , 64 BN, ReLU<br>$2 \times 2$ Max-pool   |
|                                             | $3 \times 3$ , 128 BN, ReLU<br>$3 \times 3$ , 128 BN, ReLU<br>$2 \times 2$ Max-pool |
|                                             | $3 \times 3$ , 196 BN, ReLU<br>$3 \times 3$ , 196 BN, ReLU<br>$2 \times 2$ Max-pool |
| Dense $256 \rightarrow 10$                  | Dense $256 \rightarrow 100$                                                         |

To conduct the sensitivity analysis on parameter  $\lambda$ , we set up the experiments above *MNIST* with symmetry-50% noise. Specifically, we compare  $\lambda$  in the range of [0.05, 0.35, 0.65, 0.95]. The larger the  $\lambda$  is, the less the divergence of two classifiers in JoCoR would be.

The test accuracy and label precision vs. number of epochs are in Figure 1. Obviously, As the  $\lambda$  increases, the performance of our algorithm on test accuracy gets better and better. When  $\lambda = 0.95$ , JoCoR achieves the best performance. We can see the same trends on label precision, which means that JoCoR can select clean example more precisely with a larger  $\lambda$ .

## 3. Parameter Sensitivity Analysis

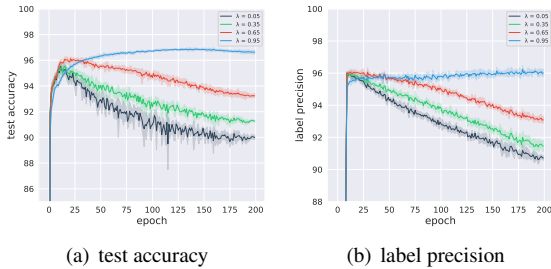

Figure 1. Results of JoCoR with different  $\lambda$  on *MNIST*
